# Supplementary material for: Hierarchical self-assembly of random mica nanosheet-stabilized silver nanoparticles into flower microstructures for highly sensitive SERS substrates
Source: Royal Society of Chemistry journal article supplement (doi:10.1039/c5ra16872d), 2015-01-01
Supplement: c5ra16872d1.pdf [file c5ra16872d1.pdf]

## Supporting Information

# Hierarchical self-assembly of random mica nanosheet- stabilized silver nanoparticles into flower microstructures for highly sensitive SERS substrates

Chih-Wei Chiu\* and Po-Hsien Lin

Department of Materials Science and Engineering, National Taiwan University of Science and  
Technology, Taipei 10607, Taiwan

\*Corresponding author:

Tel: +886-2-2737-6521; Fax: +886-2-2737-6544; E-mail: [cwchiu@mail.ntust.edu.tw](mailto:cwchiu@mail.ntust.edu.tw)

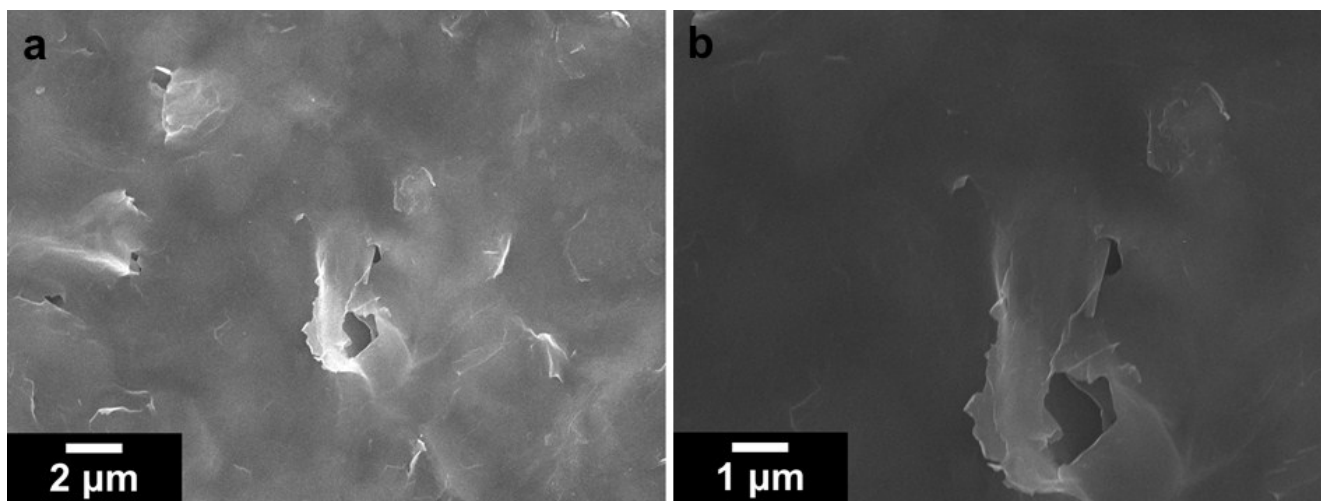

**Fig. S1** The field-emission scanning electron microscopy (FE-SEM) micrographs of the controlled self-assembled morphologies at different magnifications (a and b) showing none of the ordered structure from the pristine Na<sup>+</sup>-mica under self-assembling conditions.

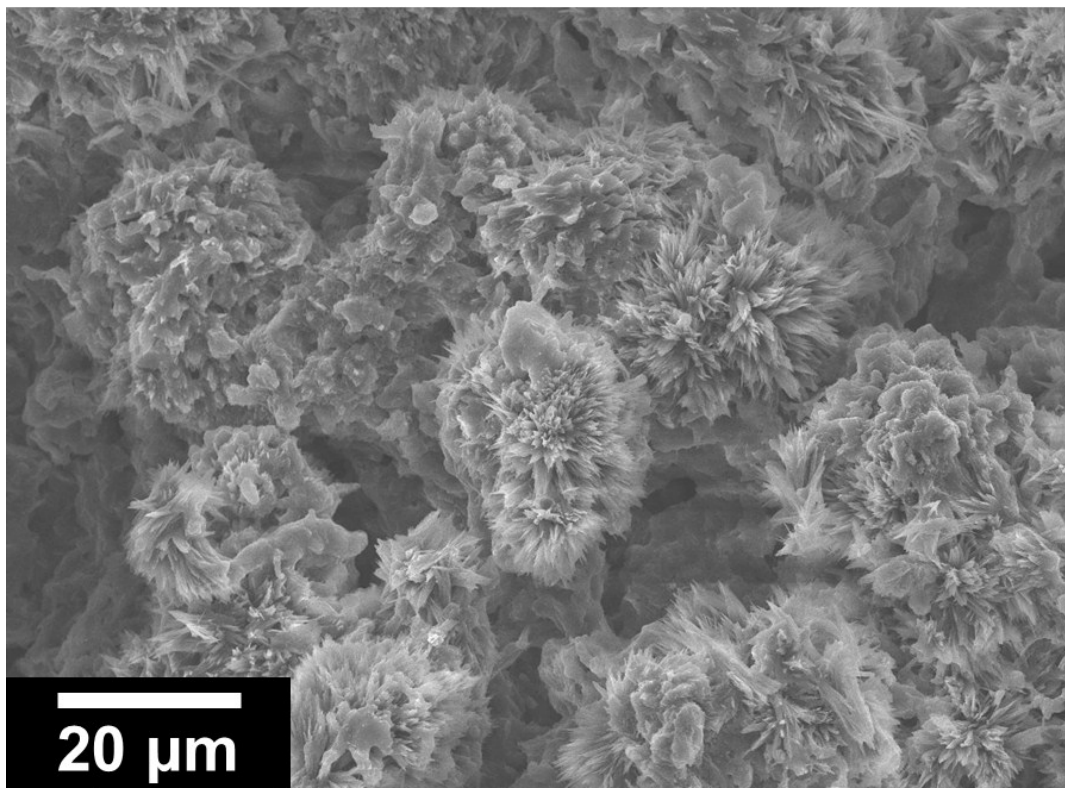

**Fig. S2** The FE-SEM micrographs of flower-like microstructure from the self-assembling of random mica nanosheet/silver nanoparticle (RMN/AgNPs) nanohybrids (weight fraction 1:1) at lower magnification.

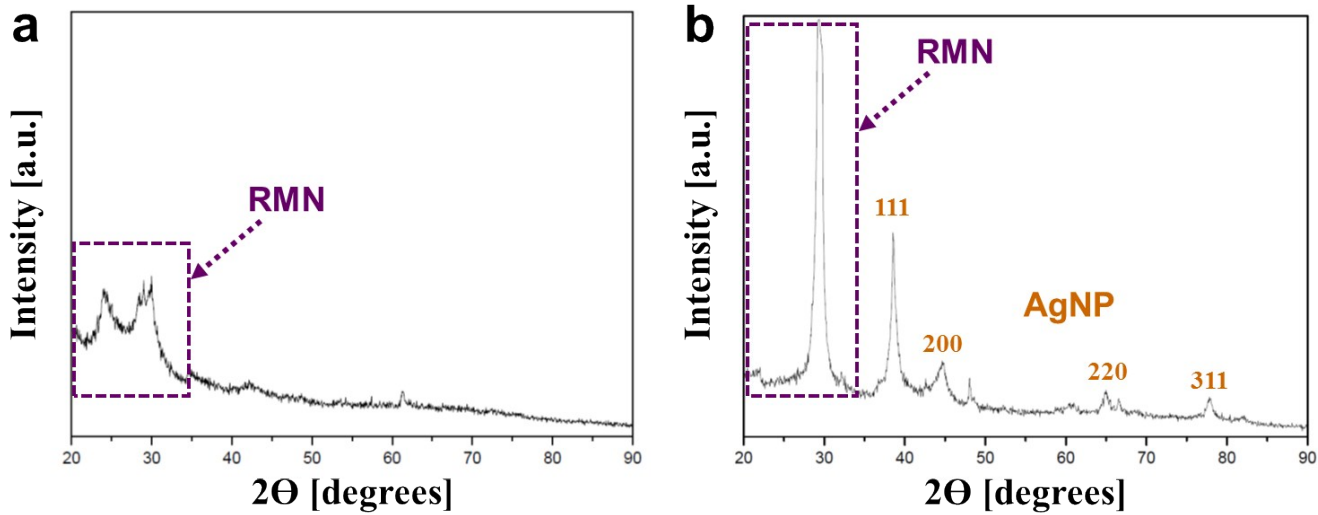

**Fig. S3** The X-ray diffraction (XRD) analysis of the rod- and flower-like microstructures of RMN/AgNPs nanohybrids at different weight fractions of (a) 1:0 and (b) 1:1.
